# Supplementary material for: Unravelling Protein-Protein Interaction Networks Linked to Aliphatic and Indole Glucosinolate Biosynthetic Pathways in Arabidopsis
Source: PubMed Central journal article supplement (PMC5712850; doi:10.3389/fpls.2017.02028), 2017-11-29
Supplement: Image1.pdf [file Image1.pdf]

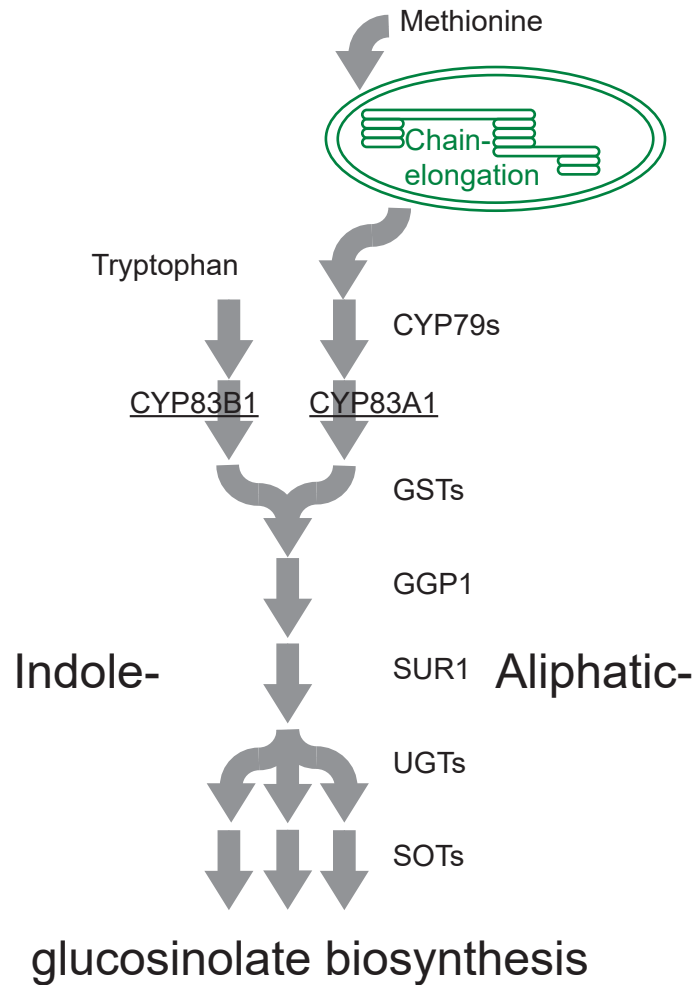

**Figure S1: Overview of the aliphatic and indole glucosinolate biosynthetic pathways.** The pathways consist of enzymes specific for either class of glucosinolates as well as common enzymes. Only aliphatic glucosinolate biosynthesis requires chain-elongation steps catalyzed inside plastids.

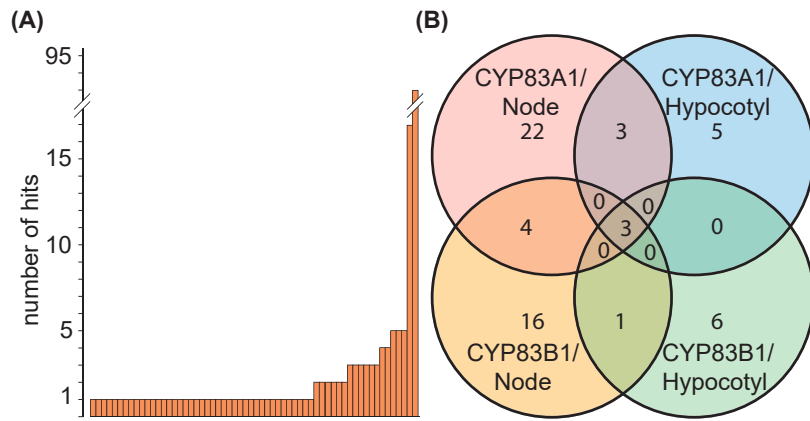

**Figure S2:** Frequency of identification of 60 candidate interactors identified by yeast 2-hybrid screens **(A)** and Venn diagram illustrating the overlap between results of the four individual screens with CYP83A1 and CYP83B1 baits and prey libraries generated from node or hypocotyl tissues **(B)**.

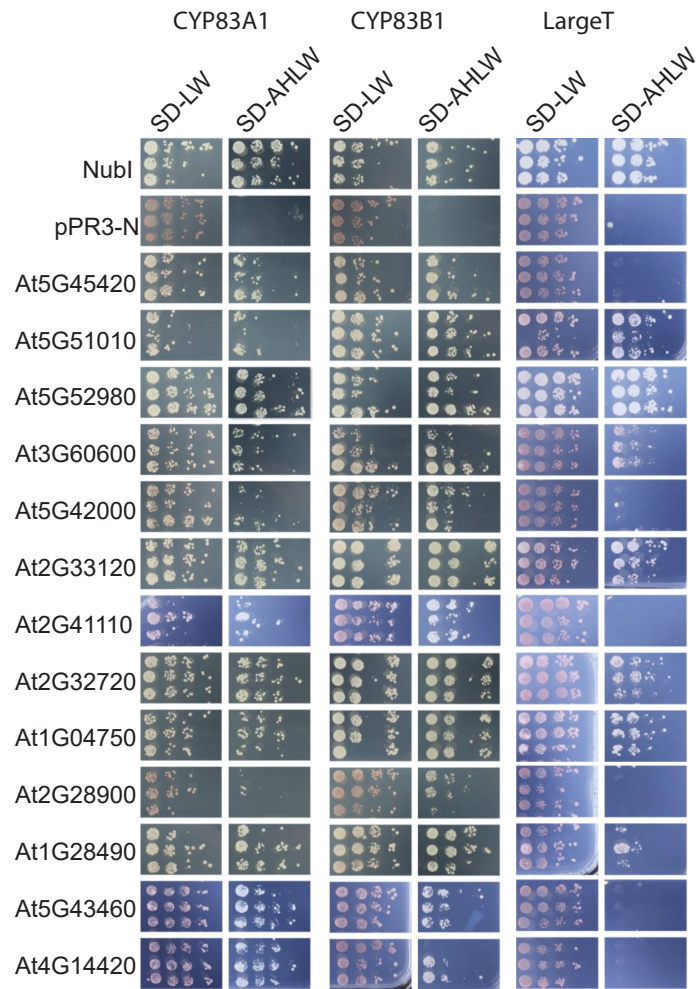

**Figure S3:** Interaction assay of interactors detected in yeast 2-hybrid screens with bait proteins CYP83A1, CYP83B1 and the unrelated control bait protein LargeT by pairwise co-expression in yeast. Cell suspensions were spotted on SD-LW (growth control) or SD-AHLW (selective medium for interacting protein pairs) medium in dilution series. Nubl: positive control; pPR3-N: empty prey vector, negative control.

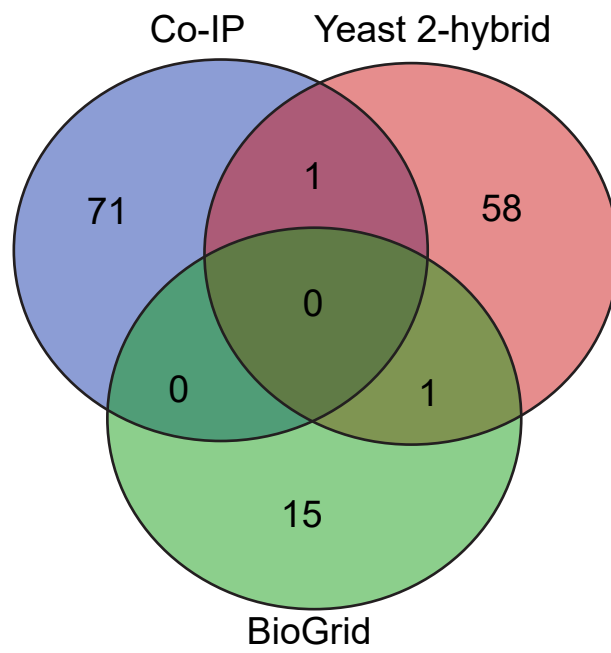

**Figure S4:** Venn diagram with the overlap between candidate interactor lists obtained by yeast 2-hybrid, Co-IP and from the BioGrid database of previously reported interactions.

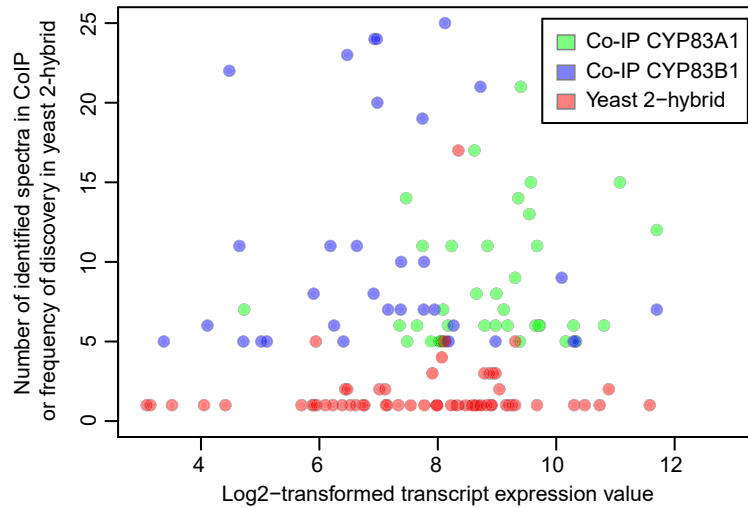

**Figure S5:** Number of identifications in yeast 2-hybrid screens and identified spectra in Co-IPs plotted against log<sub>2</sub>-transformed average transcript expression values as a proxy for protein abundance levels. Average expression values of the respective transcripts in vegetative rosettes were retrieved from the eFP anatomy browser of the BAR database (Winter et al., 2007).

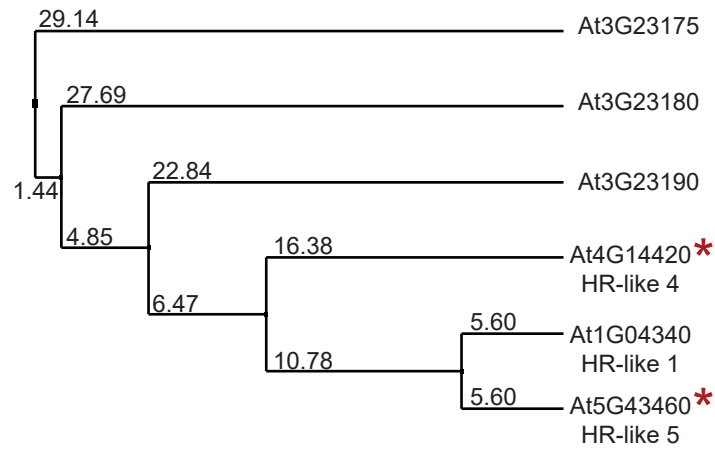

**Figure S6: Phylogeny of six proteins annotated as HR-like lesion-inducing protein-related protein.** Numbers represent distances based on neighbor joining by percentage identity. Proteins identified as interacting with glucosinolate biosynthetic proteins in yeast 2- hybrid screens are labeled with \*.

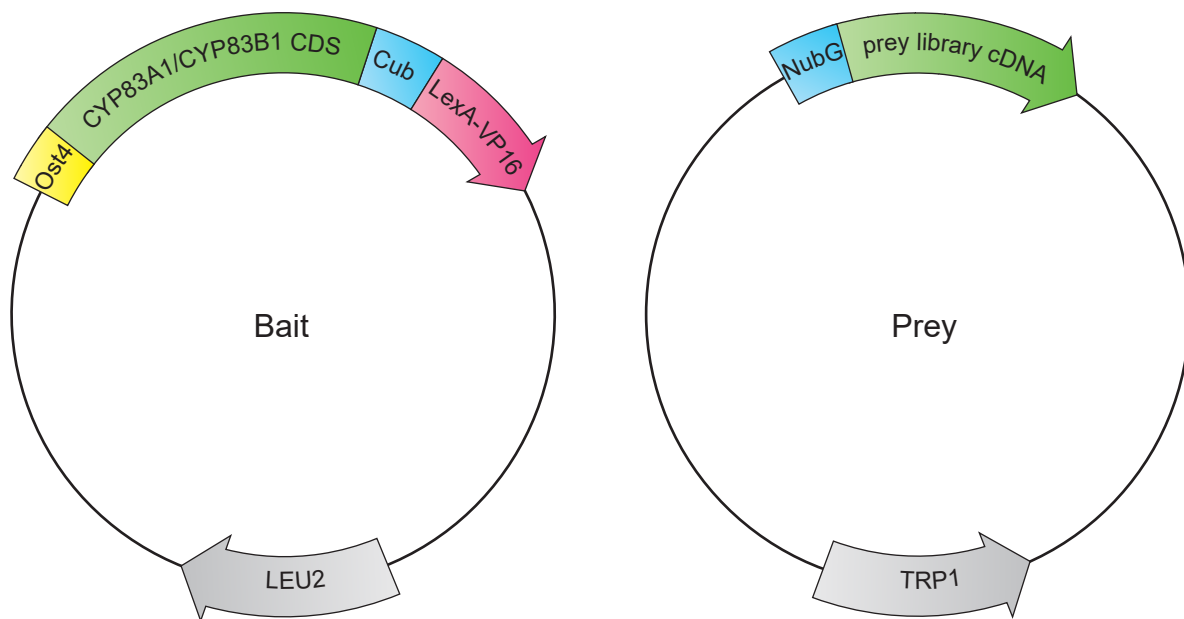

**Figure S7: Schematic overview of bait and prey constructs used in yeast 2-hybrid screens.** The bait vector encodes a fusion protein containing the Ost4-sequence to ensure correct integration into the yeast ER membrane, followed by the coding sequence (CDS) of either CYP83A1 or CYP83B1, the C-terminal half of ubiquitin (Cub) and the transcriptional activator LexA-VP16. The prey constructs contain the cDNA libraries generated from Arabidopsis mRNA and the sequence of a mutagenized N-terminal half of ubiquitin (NubG). The mutation prevents the ubiquitin halves from interacting intrinsically. The plasmids contain yeast selection markers (LEU2 and TRP1).

Upon protein-protein interaction, NubG and Cub reconstitute a functional ubiquitin, leading to proteolytic cleavage and release of LexA-VP16, and thereby the activation of the reporter system.

**Table S1:** Oligonucleotide sequences

---

|                   |                                                         |
|-------------------|---------------------------------------------------------|
| 83A1_Sfi_F        | ATTGAGGCCATTACGGCCATGGAAGATATCATCATCGGCG                |
| 83B1_Sfi_F        | ATTGAGGCCATTACGGCCATGGATCTCTTATTGATTATAGC               |
| 83A1_Sfi_nostop_R | TCAATGGCCGAGGCGGCCAATACTTGTTCACTTTGTCTGG                |
| 83B1_Sfi_nostop_R | TCAATGGCCGAGGCGGCCAGATGTGTTTCGTTGGTGAAGAAC              |
| USER_F            | GGGGCTGAGGTTTAATTAAGGATCCTTAATTAAGCCTCAGCCAAAAT         |
| USER_R            | GGGCTGAGGTTTAATTAAGGATCCTTAATTAAGCCTCAGCCCAAT           |
| AT5G45420_FW      | GGCTTAAUATGGATTTTTTCGACGAAGACAGG                        |
| AT5G51010_FW      | GGCTTAAUATGGCGATGCAGCTTCC                               |
| AT5G52980_FW      | GGCTTAAUATGGATCAACCCGACCCG                              |
| AT3G60600_FW      | GGCTTAAUATGAGTAACATCGATCTGATTGGGA                       |
| AT5G42000_FW      | GGCTTAAUATGTACGTAAGAGCACTTCCGA                          |
| AT2G33120_FW      | GGCTTAAUATGGCGCAACAATCGTTGAT                            |
| AT2G41110_FW      | GGCTTAAUATGGCGGATCAGCTCACA                              |
| AT5G61790_FW      | GGCTTAAUATGAGACAACGGCAACTATTTTCC                        |
| AT2G32720_FW      | GGCTTAAUATGGGAGACGAAGCAAAGATC                           |
| AT1G04750_FW      | GGCTTAAUATGGCGCAACAATCGTTGA                             |
| AT2G28900_FW      | GGCTTAAUATGCCTTCAAGCACATTCTCC                           |
| AT1G28490_FW      | GGCTTAAUATGTCTTCAGCTCAAGATCCATT                         |
| AT4G14420_FW      | GGCTTAAUATGGAGTTAGCTTCTTCT                              |
| AT5G43460_FW      | GGCTTAAUATGGGTTTCTTCTTTTTCTTG                           |
| AT5G45420_REV     | GGTTTAAUTTAATTAGCTGGAGTTTTCGAGCTC                       |
| AT5G51010_REV     | GGTTTAAUTTAATTTTCATGAGGTGCTATTGACATAGAAG                |
| AT5G52980_REV     | GGTTTAAUTTAATTCTATTGATTTTTCTTAGTAGTGGGAGTGA             |
| AT3G60600_REV     | GGTTTAAUTTAATTTTATGTCCTCTTCATAATGTATCCCAAAT             |
| AT5G42000_REV     | GGTTTAAUTTAATTTTCATTGGTCTCCATTGATTCCAAAT                |
| AT2G33120_REV     | GGTTTAAUTTAATTTTATTTACCGAGTTGAATCCCC                    |
| AT2G41110_REV     | GGTTTAAUTTAATTTCACTTAGCCATCATAACCTTCAC                  |
| AT5G61790_REV     | GGTTTAAUTTAATTCTAATTATCACGTCTCGTTGCC                    |
| AT2G32720_REV     | GGTTTAAUTTAATTCTACCCTGATTTGGTGTAGATACG                  |
| AT1G04750_REV     | GGTTTAAUTTAATTTTAACTTAAACCCATGGCAAAT                    |
| AT2G28900_REV     | GGTTTAAUTTAATTTTCAGTAGAAATAATGATTGTTAACGAACTGA          |
| AT1G28490_REV     | GGTTTAAUTTAATTTTAGGTCAAGAAGACAAGAACGAATAG               |
| AT4G14420_REV     | GGTTTTAAUCTAGGCAGCAGCTTTCGGGTTA                         |
| AT5G43460_REV     | GGTTTTAAUTCAGTTTGCTTTTCCCTT                             |
| USER_XFP_F        | GGCTTAAUTAAGGATCCTTAATTAACCTCAGCACGTGAGCAAGGGCGAGGAGCTG |
| USER_XFP_R        | GGTTTAAUTTACTTGTACAGCTCGTCC                             |
| Pro_83A1_F        | GGCTTAAUCTGTAAGAGAAACGAAATTCGG                          |
| Fus_Pro_83A1_R    | ATTCTTAGTUGTTACTACTTTTGAGTGTTACATTG                     |
| Pro_83B1_F        | GGCTTAAUAAGTTGGAGGAAGATTTGACAG                          |
| Fus_Pro_83B1_R    | ATTTTTTTCUGTTTGACTTACTTAAGTCTTTG                        |
| Fus_83A1_F        | AACATAAGAAUGGAAGATATCATCATCGG                           |
| 83A1_Nostop_R     | GGTTTAAUATACTTGTTCACCTTCTCTGG                           |
| Fus_83B1_F        | AGAAAAAAUUGGATCTCTTATTGATTATAGC                         |
| 83B1_Nostop_R     | GGTTTAAUGATGTGTTTCGTTGGTGAAG                            |
| CYP83A1_FW        | GGCTTAAUATGGAAGATATCATCATCGGCGTGG                       |
| CYP83A1_NSR       | GGTTTAAUGGATACTTGTTCACCTTCTCTGGAACA                     |
| CYP83B1_FW        | GGCTTAAUATGGATCTCTTATTGATTATAGCCGG                      |
| CYP83B1_NSR       | GGTTTAAUGGGATGTGTTTCGTTGGTGAAG                          |
| At1G04340_FW      | GGCTTAAUATGGGTTTCTTCTTTTTCTTG                           |
| At1G04340_NSR     | GGTTTAAUCCAGCAGCTTTAGGCTTGGGAG                          |
| At4G14420_FW      | GGCTTAAUATGGAGTTAGCTTCTTCT                              |
| At4G14420_NSR     | GGTTTAAUGGGTTTGCTTTTGCCTTTGGAG                          |
| At5G43460_FW      | GGCTTAAUATGGGTTTCTTCTTTTTCTTG                           |
| At5G43460_NSR     | GGTTTAAUCCGGCAGCTTTCGGCTTAGGTG                          |

---



**Table S2:** Calculation of library transformation efficiencies. Dilutions of the four library transformations were plated on SD-LW medium and colony forming units were counted to determine the absolute number of transformants.

| <b>Bait Library</b> | <b>CYP83A1 Hypocotyl</b> | <b>CYP83A1 Node</b> | <b>CYP83B1 Hypocotyl</b> | <b>CYP83B1 Node</b> |
|---------------------|--------------------------|---------------------|--------------------------|---------------------|
| <b>1:100</b>        | 50                       | 164                 | 58                       | 142                 |
| <b>1:1000</b>       | 5                        |                     | 6                        | 9                   |
| <b>1:10000</b>      | 1                        | 1                   | 2                        | 2                   |
| <b>Titer</b>        | $2.5 \times 10^5$        | $8.2 \times 10^5$   | $2.9 \times 10^5$        | $7.1 \times 10^5$   |

**Table S3:** T-DNA insertion lines used to assess impact of putative interactors on glucosinolate accumulation

| Gene      | Insertion line | Name/Annotation                                                                                               |
|-----------|----------------|---------------------------------------------------------------------------------------------------------------|
| At1G04340 | SALK_062978C   | HR-like lesion-inducing protein-related                                                                       |
| At1G04750 | SALK_037273C   | Vesicle associated membrane protein 721 (VAMP721); VAMP7B                                                     |
| At1G15500 | SALK_031126C   | NTT2; ATP:ADP antiporter                                                                                      |
| At1G16890 | SALK_001977C   | Ubiquitin-conjugating enzyme 36 (UBC36)                                                                       |
| At1G26670 | SALK_116968C   | Vesicle transport V-SNARE 12 (VTI12); VTI1B                                                                   |
| At1G28250 | SALK_081490C   | unknown                                                                                                       |
| At1G28490 | SALK_107167C   | SYNTAXIN OF PLANTS 61 (SYP61); OSM1                                                                           |
| At1G30935 | SALK_084201C   | F-box protein family pseudogene                                                                               |
| At1G44920 | SALK_137362C   | unknown                                                                                                       |
| At1G52870 | SALK_133672C   | Mpv17/PMP22 family; Peroxisomal membrane protein                                                              |
| At1G57765 | SALK_103508C   | unknown                                                                                                       |
| At1G59890 | SALK_043513C   | SIN3-LIKE 5, SNL5                                                                                             |
| At1G66240 | SALK_021013C   | Homolog of anti-oxidant 1 (ATX1)                                                                              |
| At2G05630 | SALK_145672C   | ATG8D                                                                                                         |
| At2G32380 | SALK_079608C   | Transmembrane protein 97                                                                                      |
| At2G32720 | SALK_009185C   | Cytochrome B5-B (CB5-B)                                                                                       |
| At2G33120 | SALK_103189C   | Vesicle associated membrane protein 722 (VAMP722); Synaprobrevin-related protein 1 (SAR1)                     |
| At2G41110 | SALK_089283C   | CALMODULIN 2 (CAM2); ATCAL5                                                                                   |
| At3G48990 | SALK_057339C   | Acyl-activating enzyme 3 (AAE3)                                                                               |
| At3G50685 | SALK_133139C   | unknown                                                                                                       |
| At3G60600 | SALK_021679C   | VAMP/Synaprobrevin-associated protein 27-1 (VAP27, VAP27-1), Vesicle associated protein                       |
| At4G14420 | SALK_008498C   | HR-like lesion-inducing protein-related                                                                       |
| At4G24920 | SALK_021134C   | Sec61 subcomplex, putative $\gamma$ subunit; P-P-bond-hydrolysis-driven protein transmembrane transporter     |
| At4G27500 | SALK_009375C   | Proton pump interactor 1 (PPI1)                                                                               |
| At4G30950 | SALK_000835C   | Fatty acid desaturase 6 (FAD6); FADC; SFD4; Stearoyl desaturase deficiency 4                                  |
| At5G16830 | SALK_054274C   | Syntaxin of plants 21 (SYP21); PEP12                                                                          |
| At5G20130 | SALK_058047C   | unknown                                                                                                       |
| At5G24680 | SALK_051987C   | Peptidase C78, ubiquitin fold modifier-specific peptidase 1/ 2                                                |
| At5G42570 | SALK_142314C   | B-cell receptor-associated 31-like                                                                            |
| At5G43460 | SALK_030116C   | HR-like lesion-inducing protein-related                                                                       |
| At5G43580 | SALK_057639C   | Unusual serine protease inhibitor (UPI)                                                                       |
| At5G52240 | SALK_035827C   | Membrane-associated progesterone binding protein 5 (MAPR5); ATMP1; Membrane steroid binding protein 1 (MSBP1) |
| At5G60920 | SALK_106466C   | COBRA (COB)                                                                                                   |
| At5G61790 | SALK_083600C   | Calnexin 1 (CNX1)                                                                                             |
| At5G67600 | SALK_038916C   | WIH1 (WINDHOSE 1)                                                                                             |

**Table S4:** Two-way ANOVA testing for effects of genotype and plant tray on aliphatic and indole glucosinolates with the linear model aliphatic or indole glucosinolates = Genotype + Tray.

|                          |           | Df  | Sum Sq | Mean Sq  | F value | Pr(>F)      |
|--------------------------|-----------|-----|--------|----------|---------|-------------|
| Aliphatic glucosinolates | Genotype  | 34  | 1782   | 0.05241  | 4038    | 1.17e-11*** |
|                          | Tray      | 1   | 0.001  | 0.00109  | 0.084   | 0.772       |
|                          | Residuals | 348 | 4517   | 0.01298  |         |             |
| Indole glucosinolates    | Genotype  | 34  | 0.1516 | 0.004460 | 1100    | 0.326       |
|                          | Tray      | 1   | 0.0005 | 0.000518 | 0.128   | 0.721       |
|                          | Residuals | 348 | 14106  | 0.004053 |         |             |

\*\*\* indicates  $p < 0.001$

Analyzed genotypes are wildtype (n = 22) or T-DNA insertion lines (n = 6-12) listed in Table S3.

Aliphatic glucosinolates:

3-methylthiopropyl-, 3-methylsulfinyl-, 4-methylthiobutyl-, 4-methylsulfinylbutyl-, 5-methylsulfinylpentyl-, 7-methylthioheptyl-, 7-methylsulfinylheptyl-, 8-methylthiooctyl-, 8-methylsulfinyloctyl-glucosinolate

Indole glucosinolates:

Indol-3-ylmethyl-, 4-methoxy-indol-3-ylmethyl-, N-methoxy-indol-3-ylmethyl-glucosinolate

**Table S5:** Two-way ANOVA testing for effects of T-DNA insertions on different classes of glucosinolates with the linear model short-chained aliphatic, long-chained aliphatic, total aliphatic or indole glucosinolates = Genotype + Experiment.

|                                        |            | Df  | Sum Sq | Mean Sq | F value | Pr(>F)      |
|----------------------------------------|------------|-----|--------|---------|---------|-------------|
| Short-chained aliphatic glucosinolates | Genotype   | 7   | 22.48  | 3.211   | 25.13   | <2e-16***   |
|                                        | Experiment | 1   | 4.16   | 4.156   | 32.53   | 2.44e-08*** |
|                                        | Residuals  | 363 | 46.38  | 0.128   |         |             |
| Long-chained aliphatic glucosinolates  | Genotype   | 7   | 0.42   | 0.0596  | 0.39    | 0.908       |
|                                        | Experiment | 1   | 0.40   | 0.4003  | 2.62    | 0.106       |
|                                        | Residuals  | 363 | 55.45  | 0.1528  |         |             |
| Aliphatic glucosinolates               | Genotype   | 7   | 8.16   | 11.660  | 11.14   | 8.83e-13*** |
|                                        | Experiment | 1   | 1.63   | 16.276  | 15.55   | 9.65e-05*** |
|                                        | Residuals  | 363 | 38.00  | 0.1047  |         |             |
| Indole glucosinolates                  | Genotype   | 7   | 1.56   | 0.2228  | 1.657   | 0.1184      |
|                                        | Experiment | 1   | 0.46   | 0.4635  | 3.448   | 0.0641      |
|                                        | Residuals  | 363 | 48.80  | 0.1344  |         |             |

\*\*\* indicates  $p < 0.001$

Analyzed genotypes are wildtype or single (*hr1*, *hr4*, *hr5*), double (*hr1/4*, *hr1/5*, *hr4/5*) or triple (*hr1/4/5*) T-DNA insertion lines.

n = 43-48 for each genotype in two independent experiments with n = 21-24 each.

Short-chained aliphatic glucosinolates:

3-methylthiopropyl-, 3-methylsulfinyl-, 3-hydroxypropyl-, 3-benzoyloxypropyl-, 4-methylthiobutyl-, 4-methylsulfinylbutyl-, 4-hydroxybutyl-, 4-benzoyloxybutyl-, 5-methylsulfinylpentyl-glucosinolate

Long-chained aliphatic glucosinolates:

7-methylthioheptyl-, 7-methylsulfinylheptyl-, 8-methylthiooctyl-, 8-methylsulfinyloctyl-glucosinolate

Aliphatic glucosinolates:

Short-chained aliphatic and long-chained aliphatic glucosinolates

Indole glucosinolates:

Indol-3-ylmethyl-, 4-methoxy-indol-3-ylmethyl-, N-methoxy-indol-3-ylmethyl-glucosinolate

**Table S6:** Interactors found in the BioGrid database

| Gene      | Name/Annotation                                                         | Interactor of |
|-----------|-------------------------------------------------------------------------|---------------|
| At1G14700 | Purple acid phosphatase 3 (PAP3)                                        | CYP83A1       |
| At1G17280 | Ubiquitin-conjugating enzyme 34 (UBC34)                                 | CYP83A1       |
| At1G21240 | Wall-associated kinase 3 (WAK3)                                         | CYP83A1       |
| At1G29060 | Golgi localized QcSNARE involved in response to salt and osmotic stress | CYP83A1       |
| At2G26180 | IQ-domain 6 (IQD6)                                                      | CYP83A1       |
| At3G05120 | GA insensitive dwarf 1A (GID1A)                                         | CYP83B1       |
| At3G08510 | Phosphoinositide-specific phospholipase C (PI-PLC)                      | CYP83A1       |
| At3G10640 | VPS60.1                                                                 | CYP83A1       |
| At3G12180 | Cornichon family protein                                                | CYP83A1       |
| At3G48890 | Membrane steroid binding protein 2 (MSBP2)                              | CYP83A1       |
| At4G20790 | Leucine-rich repeat protein kinase family protein                       | CYP83A1       |
| At4G27610 | unknown                                                                 | CYP83A1       |
| At4G35950 | GTP binding protein, member of ROP GTPases gene family-like (RAC6)      | CYP83A1       |
| At5G47120 | Bax inhibitor 1, functions as an attenuator of cell death (BI-1)        | CYP83A1       |
| At5G52240 | Membrane steroid binding protein 1 (MSBP1)                              | CYP83A1       |
| At5G59650 | Leucine-rich repeat protein kinase family protein                       | CYP83A1       |
